# Supplementary material
Source: PubMed Central journal article supplement (PMC5833620)
Supplement: jamasurg-153-14-s001.pdf [file jamasurg-153-14-s001.pdf]

## Supplementary Online Content

Guduguntla V, Syrjamaki JD, Ellimoottil C, et al. Drivers of payment variation in 90-day coronary artery bypass grafting episodes. *JAMA Surg*. Published online August 23, 2017. doi:10.1001/jamasurg.2017.2881

### **eAppendix.** CABG Episode Definition

This supplementary material has been provided by the authors to give readers additional information about their work.

**eAppendix. CABG Episode Definition**

| <b>Rule Type</b> | <b>Descriptor</b>                       | <b>Code Type</b> | <b>Number / Range</b> | <b>Full Description*</b>                                                  |
|------------------|-----------------------------------------|------------------|-----------------------|---------------------------------------------------------------------------|
| <b>Inclusion</b> | Inpatient                               | POS Codes        | 1                     | Inpatient                                                                 |
| <b>Inclusion</b> | Operations On The Cardiovascular System | ICD_9_Proc_Codes | 36.1                  | Aortocoronary bypass for heart revascularization, not otherwise specified |
| <b>Inclusion</b> |                                         | ICD_9_Proc_Codes | 36.11                 | (Aorto)coronary bypass of one coronary artery                             |
| <b>Inclusion</b> |                                         | ICD_9_Proc_Codes | 36.12                 | (Aorto)coronary bypass of two coronary arteries                           |
| <b>Inclusion</b> |                                         | ICD_9_Proc_Codes | 36.13                 | (Aorto)coronary bypass of three coronary arteries                         |
| <b>Inclusion</b> |                                         | ICD_9_Proc_Codes | 36.14                 | (Aorto)coronary bypass of four or more coronary arteries                  |
| <b>Inclusion</b> |                                         | ICD_9_Proc_Codes | 36.15                 | Single internal mammary-coronary artery bypass                            |
| <b>Inclusion</b> |                                         | ICD_9_Proc_Codes | 36.16                 | Double internal mammary-coronary artery bypass                            |
| <b>Inclusion</b> |                                         | ICD_9_Proc_Codes | 36.17                 | Abdominal-coronary artery bypass                                          |
| <b>Inclusion</b> |                                         | ICD_9_Proc_Codes | 36.19                 | Other bypass anastomosis for heart revascularization                      |
| <b>Inclusion</b> |                                         | ICD_9_Proc_Codes | 36.2                  | Heart revascularization by arterial implant                               |
| <b>Inclusion</b> | Surgery: Cardiovascular System          | CPT Codes        | 33510—33516           | Coronary artery bypass, vein only; single coronary venous graft           |

|                  |                                    |                |             |                                                                                 |
|------------------|------------------------------------|----------------|-------------|---------------------------------------------------------------------------------|
| <b>Inclusion</b> |                                    | CPT Codes      | 33533—33536 | Coronary artery bypass, using arterial graft(s); single arterial graft          |
| <b>Exclusion</b> | Diseases Of The Circulatory System | ICD_9_DX_Codes | 410         | Acute myocardial infarction of anterolateral wall, episode of care unspecified  |
| <b>Exclusion</b> |                                    | ICD_9_DX_Codes | 410.01      | Acute myocardial infarction of anterolateral wall, initial episode of care      |
| <b>Exclusion</b> |                                    | ICD_9_DX_Codes | 410.1       | Acute myocardial infarction of other anterior wall, episode of care unspecified |
| <b>Exclusion</b> |                                    | ICD_9_DX_Codes | 410.11      | Acute myocardial infarction of other anterior wall, initial episode of care     |

|                  |  |                |        |                                                                                  |
|------------------|--|----------------|--------|----------------------------------------------------------------------------------|
| <b>Exclusion</b> |  | ICD_9_DX_Codes | 410.2  | Acute myocardial infarction of inferolateral wall, episode of care unspecified   |
| <b>Exclusion</b> |  | ICD_9_DX_Codes | 410.21 | Acute myocardial infarction of inferolateral wall, initial episode of care       |
| <b>Exclusion</b> |  | ICD_9_DX_Codes | 410.3  | Acute myocardial infarction of inferoposterior wall, episode of care unspecified |
| <b>Exclusion</b> |  | ICD_9_DX_Codes | 410.31 | Acute myocardial infarction of inferoposterior wall, initial episode of care     |
| <b>Exclusion</b> |  | ICD_9_DX_Codes | 410.4  | Acute myocardial infarction of other inferior wall, episode of care unspecified  |
| <b>Exclusion</b> |  | ICD_9_DX_Codes | 410.41 | Acute myocardial infarction of other inferior wall, initial episode of care      |
| <b>Exclusion</b> |  | ICD_9_DX_Codes | 410.5  | Acute myocardial infarction of other lateral wall, episode of care unspecified   |
| <b>Exclusion</b> |  | ICD_9_DX_Codes | 410.51 | Acute myocardial infarction of other lateral                                     |

|                  |  |                |        |                                                                                   |
|------------------|--|----------------|--------|-----------------------------------------------------------------------------------|
|                  |  |                |        | wall, initial episode of care                                                     |
| <b>Exclusion</b> |  | ICD_9_DX_Codes | 410.6  | True posterior wall infarction, episode of care unspecified                       |
| <b>Exclusion</b> |  | ICD_9_DX_Codes | 410.61 | True posterior wall infarction, initial episode of care                           |
| <b>Exclusion</b> |  | ICD_9_DX_Codes | 410.7  | Subendocardial infarction, episode of care unspecified                            |
| <b>Exclusion</b> |  | ICD_9_DX_Codes | 410.71 | Subendocardial infarction, initial episode of care                                |
| <b>Exclusion</b> |  | ICD_9_DX_Codes | 410.8  | Acute myocardial infarction of other specified sites, episode of care unspecified |
| <b>Exclusion</b> |  | ICD_9_DX_Codes | 410.81 | Acute myocardial infarction of other specified sites, initial episode of care     |

|                  |                                         |                  |             |                                                                              |
|------------------|-----------------------------------------|------------------|-------------|------------------------------------------------------------------------------|
| <b>Exclusion</b> |                                         | ICD_9_DX_Codes   | 410.9       | Acute myocardial infarction of unspecified site, episode of care unspecified |
| <b>Exclusion</b> |                                         | ICD_9_DX_Codes   | 410.91      | Acute myocardial infarction of unspecified site, initial episode of care     |
| <b>Exclusion</b> | Operations On The Cardiovascular System | ICD_9_Proc_Codes | 35.00—35.28 | Closed heart valvotomy, unspecified valve                                    |
| <b>Exclusion</b> |                                         | ICD_9_Proc_Codes | 35.31—35.42 | Operations on papillary muscle                                               |
| <b>Exclusion</b> |                                         | ICD_9_Proc_Codes | 35.50—35.84 | Repair of unspecified septal defect of heart with prosthesis                 |
| <b>Exclusion</b> |                                         | ICD_9_Proc_Codes | 35.91—35.99 | Interatrial transposition of venous return                                   |
| <b>Exclusion</b> |                                         | ICD_9_Proc_Codes | 37.51       | Heart transplantation                                                        |
| <b>Exclusion</b> | Surgery: Cardiovascular System          | CPT Codes        | 33400—33478 | Valvuloplasty, aortic valve; open, with cardiopulmonary bypass               |
| <b>Exclusion</b> |                                         | CPT Codes        | 33400—33417 | Valvuloplasty, aortic valve; open, with cardiopulmonary bypass               |
| <b>Exclusion</b> |                                         | CPT Codes        | 33420—33430 | Valvotomy, mitral valve; closed heart                                        |

|                      |                                |           |             |                                                                                                                                                                          |
|----------------------|--------------------------------|-----------|-------------|--------------------------------------------------------------------------------------------------------------------------------------------------------------------------|
| <b>Exclusion</b>     |                                | CPT Codes | 33460—33478 | Valvectomy, tricuspid valve, with cardiopulmonary bypass                                                                                                                 |
| <b>Exclusion</b>     |                                | CPT Codes | 33600—33853 | Closure of atrioventricular valve (mitral or tricuspid) by suture or patch                                                                                               |
| <b>Exclusion</b>     |                                | CPT Codes | 33935       | Heart-lung transplant with recipient cardiectomy-pneumectomy                                                                                                             |
| <b>Exclusion</b>     |                                | CPT Codes | 33945       | Heart transplant, with or without recipient cardiectomy                                                                                                                  |
| <b>Risk Adjustor</b> | Surgery: Cardiovascular System | CPT Codes | 33530       | Reoperation, coronary artery bypass procedure or valve procedure, more than 1 month after original operation (List separately in addition to code for primary procedure) |
| <b>Risk Adjustor</b> |                                | CPT Codes | 33533—33536 | Coronary artery bypass, using arterial graft(s); single arterial graft                                                                                                   |

\* If a code range is listed, the description refers to the first code in the series.
